# Supplementary material for: The association of ACE1, ACE2, TMPRSS2, IFITM3 and VDR polymorphisms with COVID-19 severity: A systematic review and meta-analysis
Source: PubMed Central journal article supplement (PMC9360474; doi:10.17179/excli2022-4976), 2022-06-20
Supplement: EXCLI-21-818-s-001.pdf [file EXCLI-21-818-s-001.pdf]

**Supplementary information to:**

**Review article:**

**THE ASSOCIATION OF *ACE1*, *ACE2*, *TMPRSS2*, *IFITM3* AND *VDR*  
POLYMORPHISMS WITH COVID-19 SEVERITY:  
A SYSTEMATIC REVIEW AND META-ANALYSIS**

Zorana Dobrijević<sup>id</sup>, Dragana Robajac<sup>id</sup>, Nikola Gligorijević<sup>id</sup>, Miloš Šunderić<sup>id</sup>,  
Ana Penezić<sup>id</sup>, Goran Miljuš<sup>id</sup>, Olgica Nedić<sup>id</sup>

University of Belgrade – Institute for the Application of Nuclear Energy (INEP), Belgrade,  
Serbia

\* **Corresponding author:** Zorana Dobrijević, Department for Metabolism, Institute for the  
Application of Nuclear Energy (INEP), University of Belgrade, Belgrade, Serbia  
Tel: +381 11 2618 666, E-mail: [zorana.dobrijevic@inep.co.rs](mailto:zorana.dobrijevic@inep.co.rs)

<https://dx.doi.org/10.17179/excli2022-4976>

This is an Open Access article distributed under the terms of the Creative Commons Attribution License  
(<http://creativecommons.org/licenses/by/4.0/>).

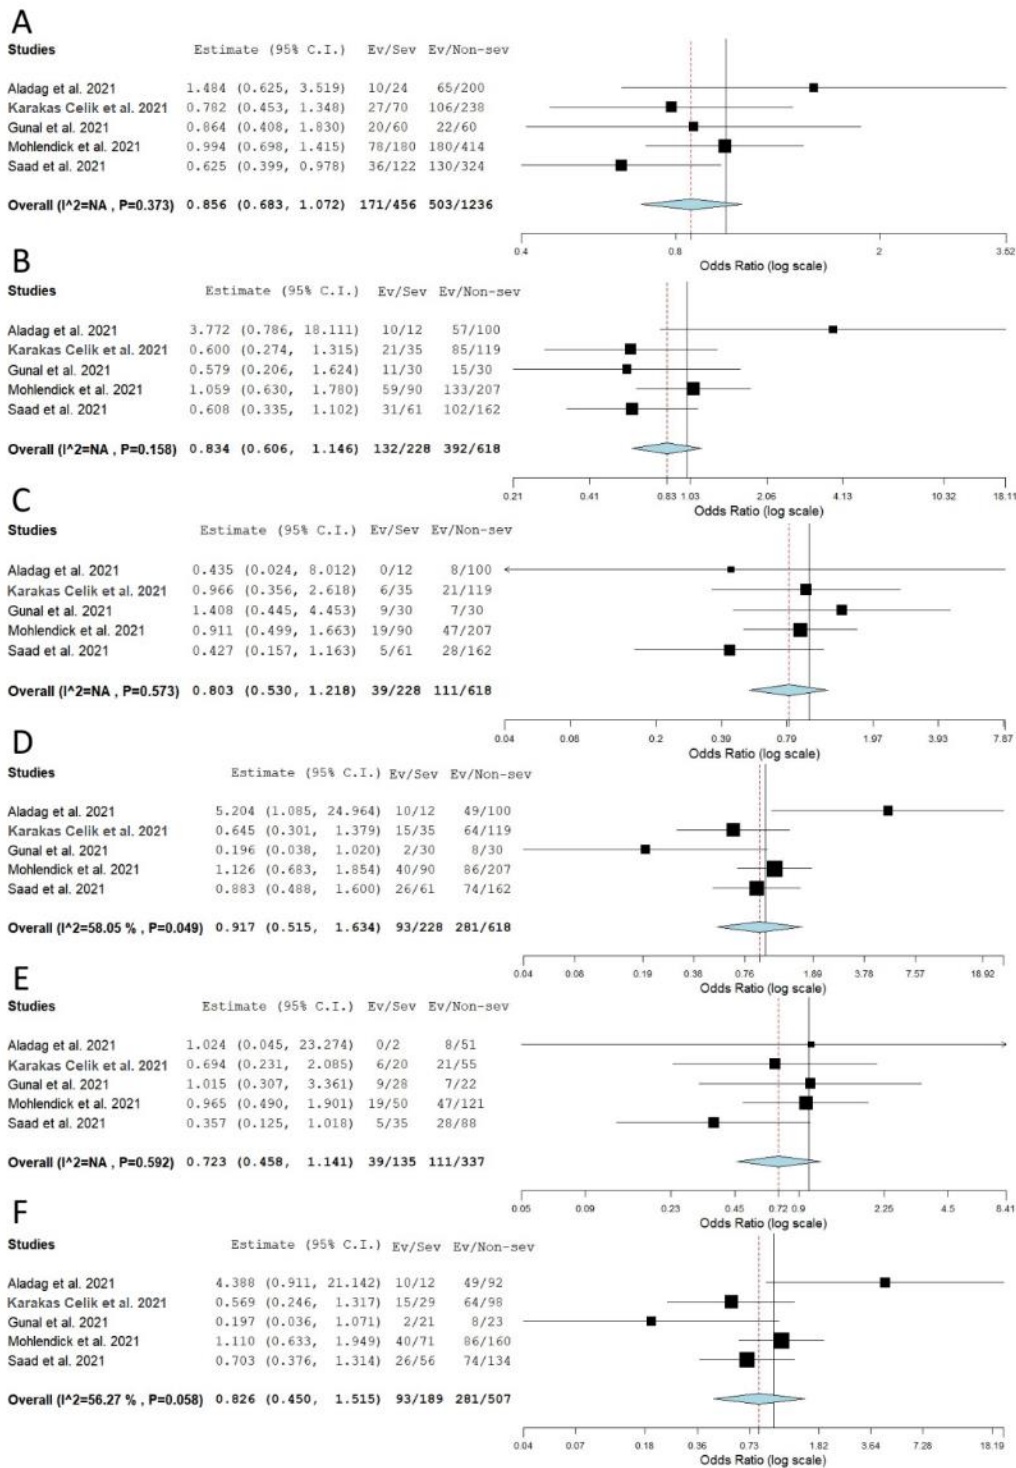

**Supplementary Figure 1:** Meta-analysis of the association between rs1799752 in *ACE1* and COVID-19 severity: comparison severe vs. non-severe. **A)** allelic model; **B)** dominant model; **C)** recessive model; **D)** overdominant model; **E)** II vs. DD; **F)** DI vs. DD. The results of the included studies presented as ORs, with 95 CI, and the overall effect with 95 % CI are shown in the forest plot. *P* values given are derived from heterogeneity tests.

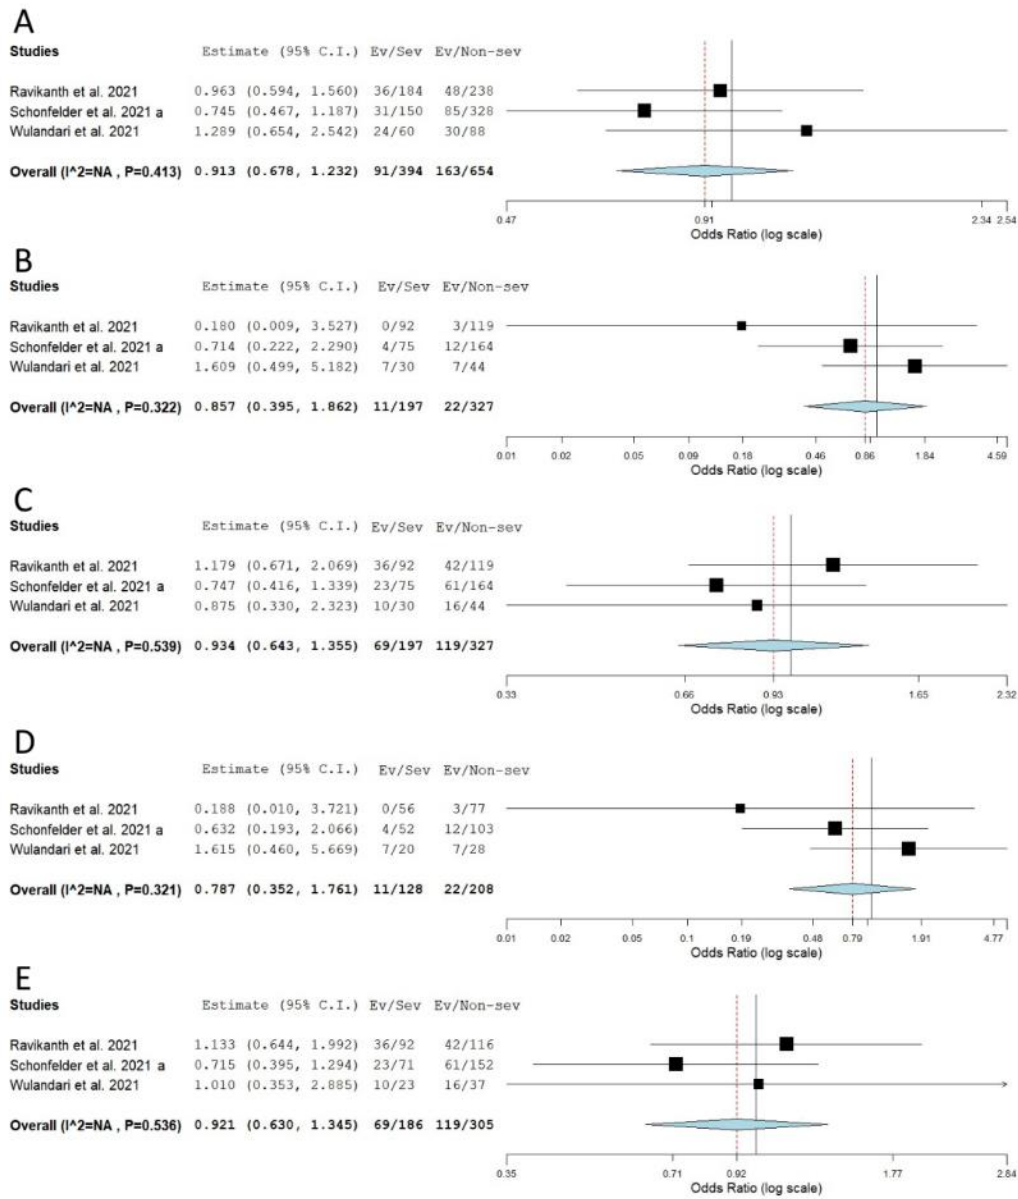

**Supplementary Figure 2:** Meta-analysis of the association between rs12329760 in *TMPRSS2* and COVID-19 severity, after the exclusion of asymptomatic SARS-CoV-2 infected participants: comparison severe vs. non-severe. **A)** allelic model; **B)** recessive model; **C)** overdominant model; **D)** AA vs. GG; **E)** GA vs. GG. The results of the included studies presented as ORs, with 95 % CI, and the overall effect with 95 % CI are shown in the forest plot. *P* values given are derived from heterogeneity tests.

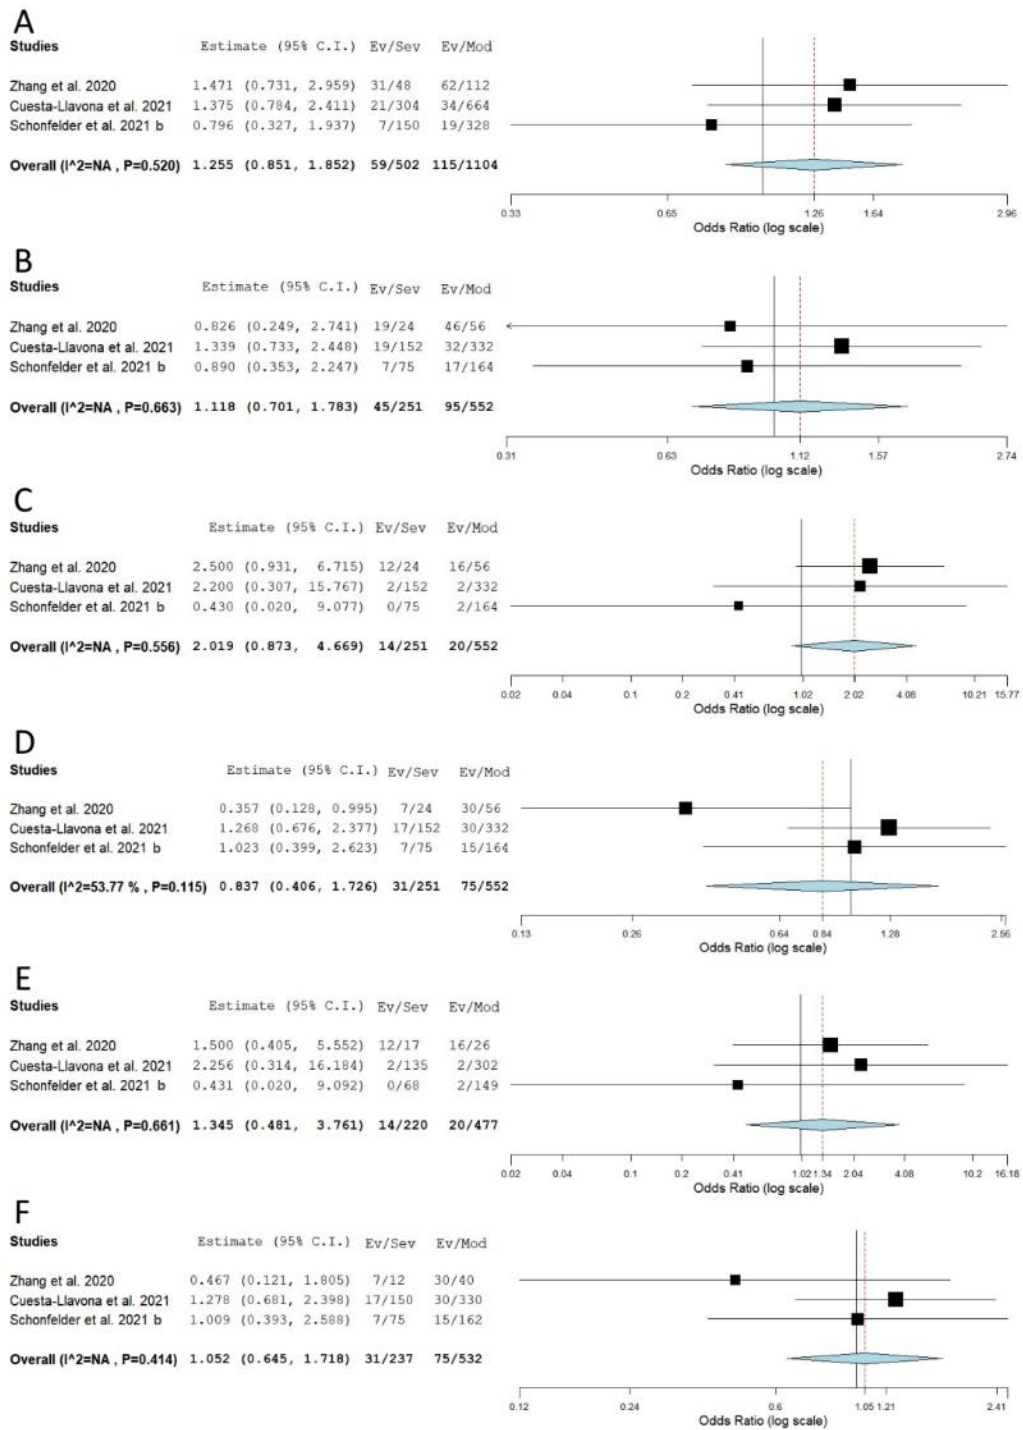

**Supplementary Figure 3:** Meta-analysis of the association between rs12252 in *IFITM3* and COVID-19 severity: comparison severe vs. moderate. **A)** allelic model; **B)** dominant model; **C)** recessive model; **D)** overdominant model; **E)** CC vs. TT; **F)** TC vs. TT. The results of the included studies presented as ORs, with 95 % CI, and the overall effect with 95 % CI are shown in the forest plot. *P* values given are derived from heterogeneity tests.

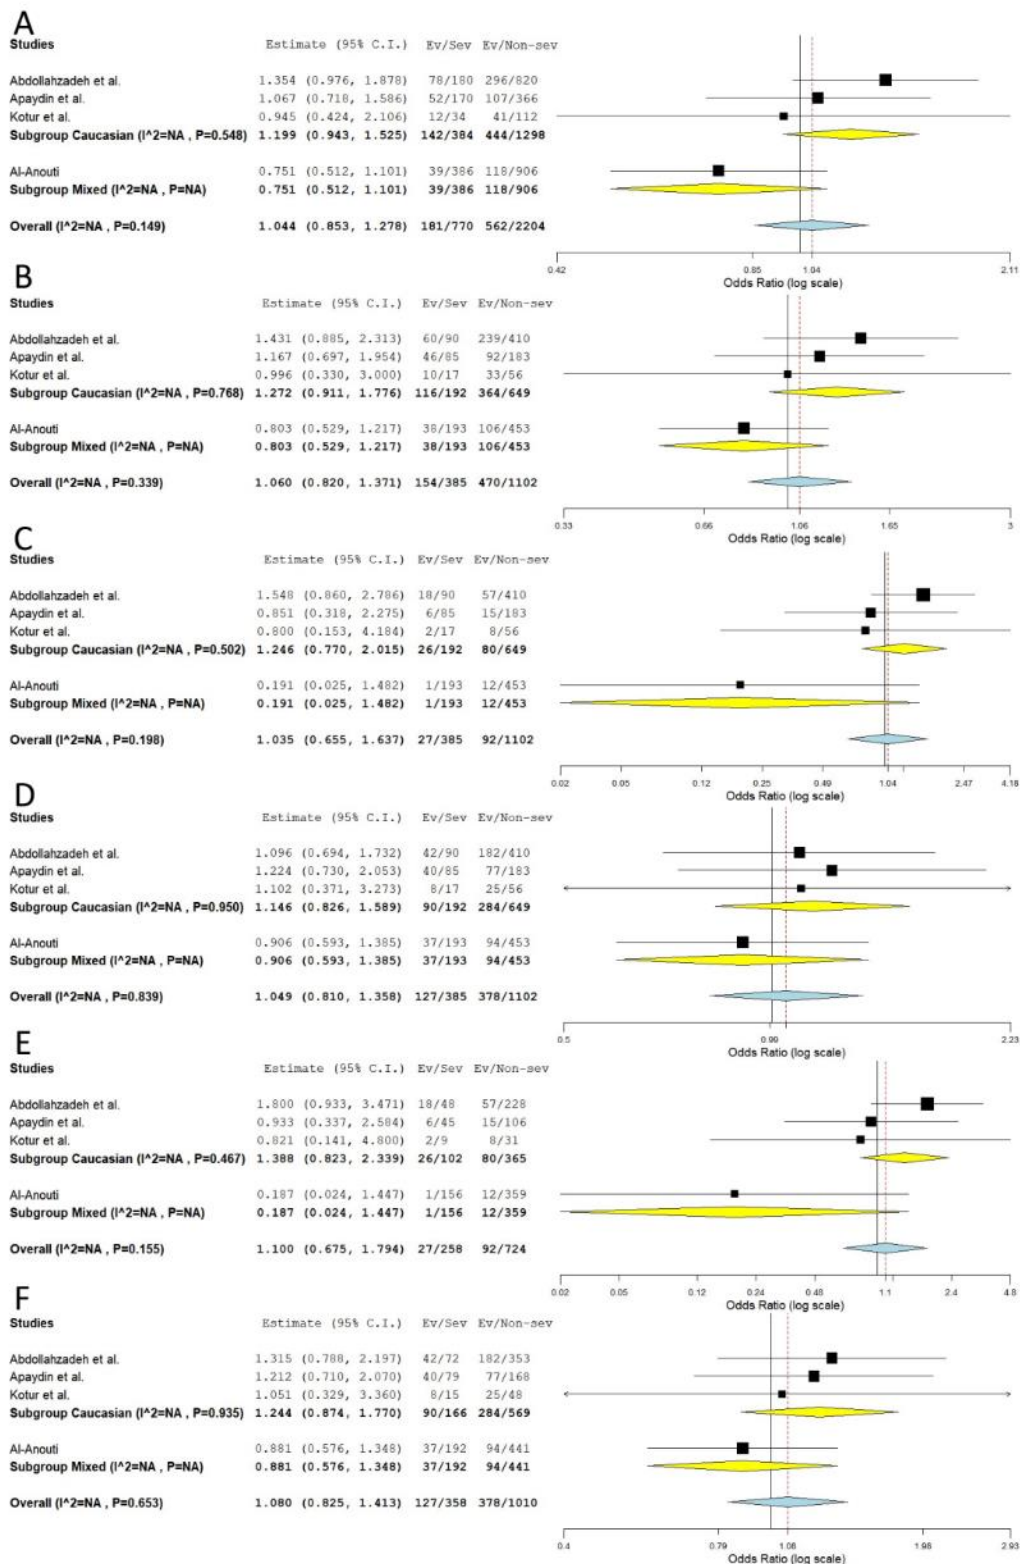

**Supplementary Figure 4:** Meta-analysis of the association between rs2228570 in *VDR* and COVID-19 severity: comparison severe vs. non-severe. **A)** allelic model; **B)** dominant model; **C)** recessive model; **D)** overdominant model; **E)** AA vs. GG; **F)** GA vs. GG. The results of the included studies presented as ORs, with 95 % CI, and the overall effect with 95 % CI are shown in the forest plot. *P* values given are derived from heterogeneity tests.

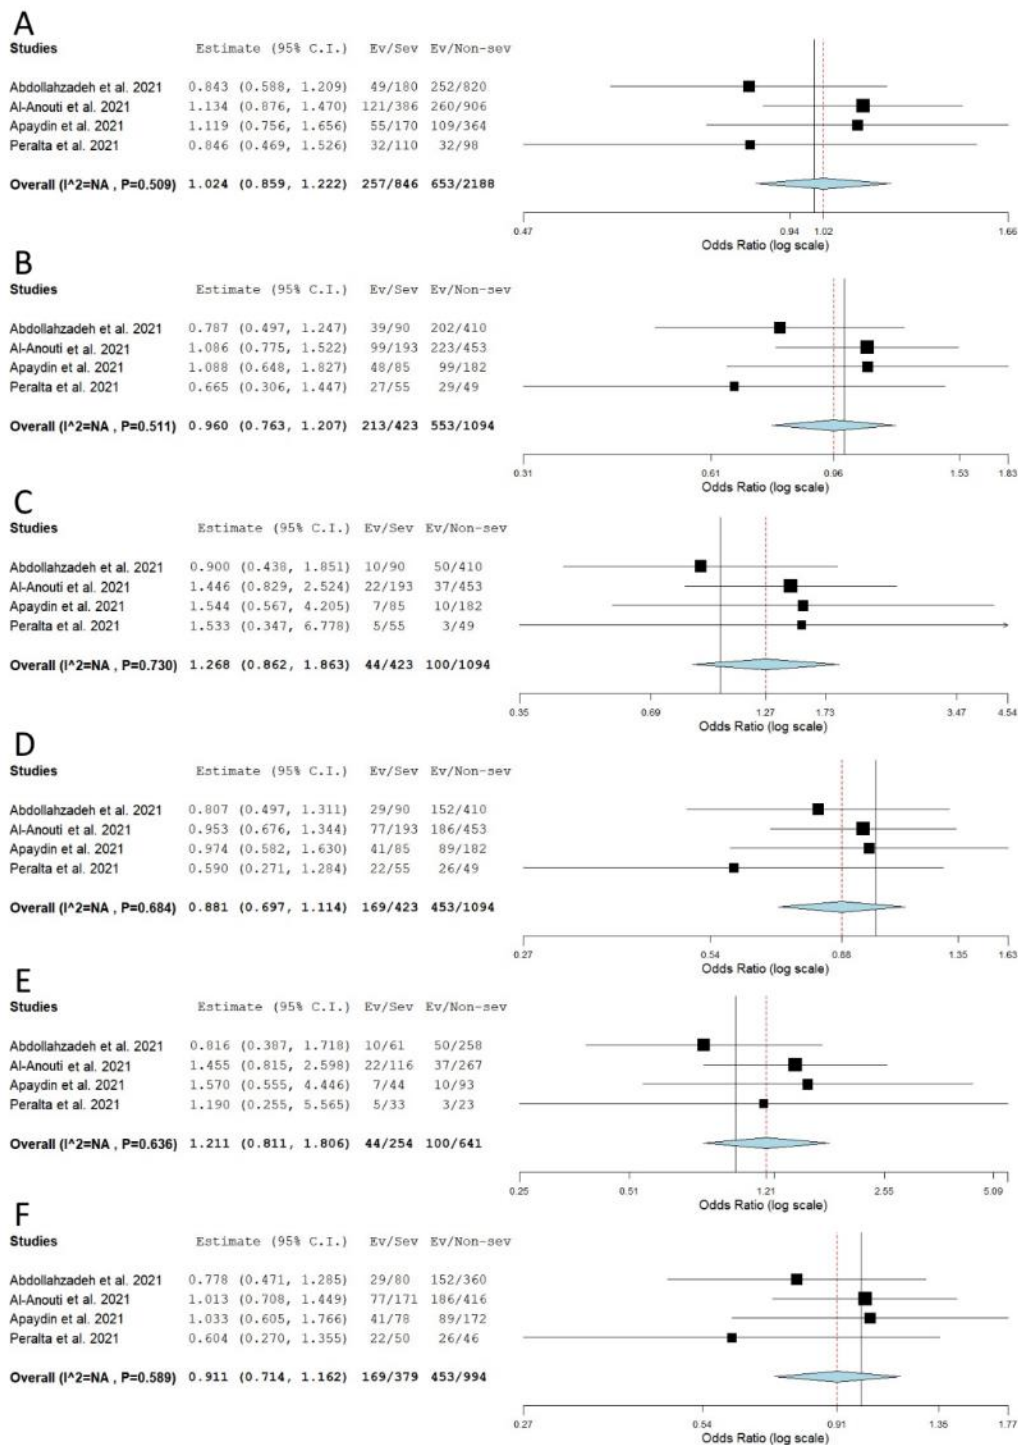

**Supplementary Figure 5:** Meta-analysis of the association between rs731236 in *VDR* and COVID-19 severity: comparison severe vs. non-severe. **A)** allelic model; **B)** dominant model; **C)** recessive model; **D)** overdominant model; **E)** GG vs. AA; **F)** AG vs. AA. The results of the included studies presented as ORs, with 95 % CI, and the overall effect with 95 % CI are shown in the forest plot. *P* values given are derived from heterogeneity tests.

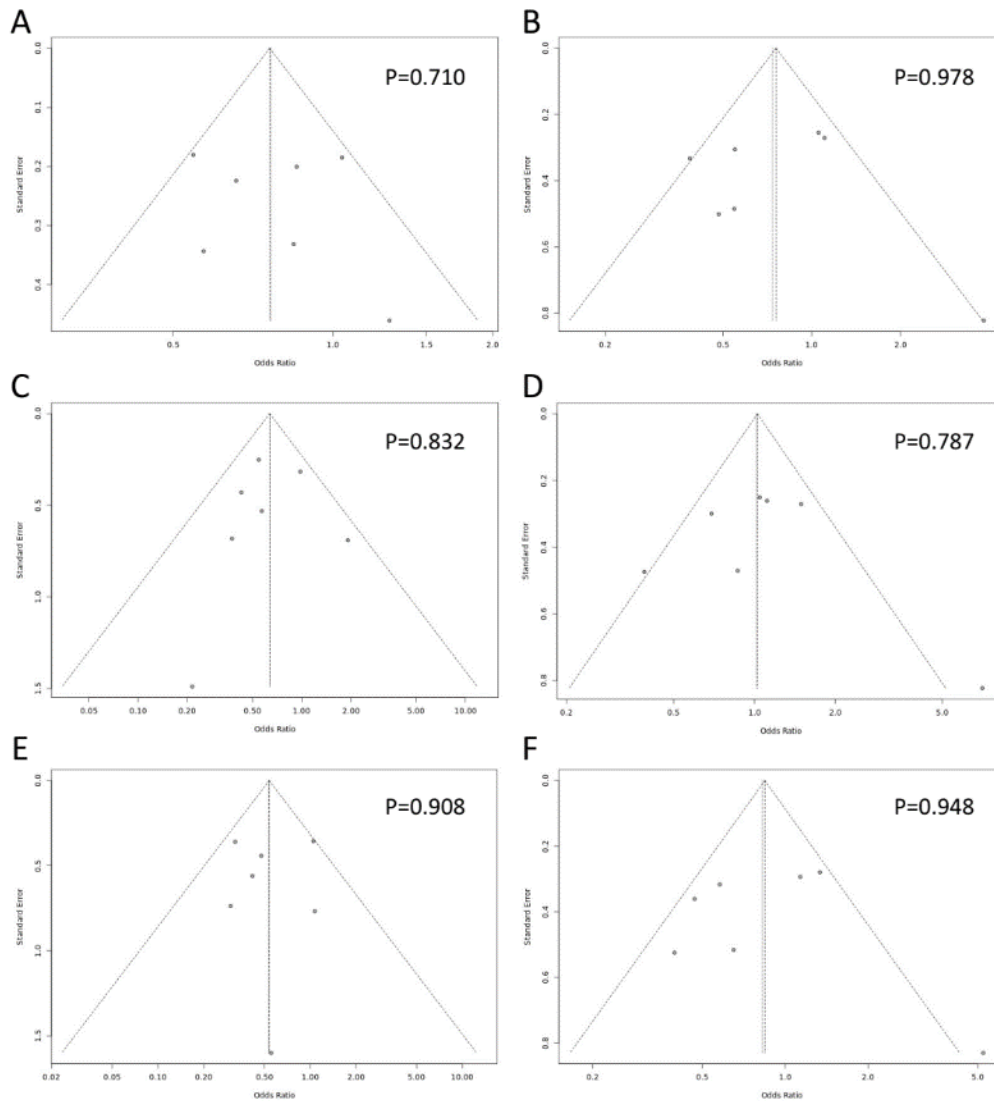

**Supplementary Figure 6:** Funnel plots for meta-analyses of the association between rs1799752 in *ACE1* and COVID-19 severity: comparison severe vs. moderate. **A)** allelic model; **B)** dominant model; **C)** recessive model; **D)** overdominant model; **E)** II vs. DD; **F)** DI vs. DD. *P* values presented are derived from Egger's tests.

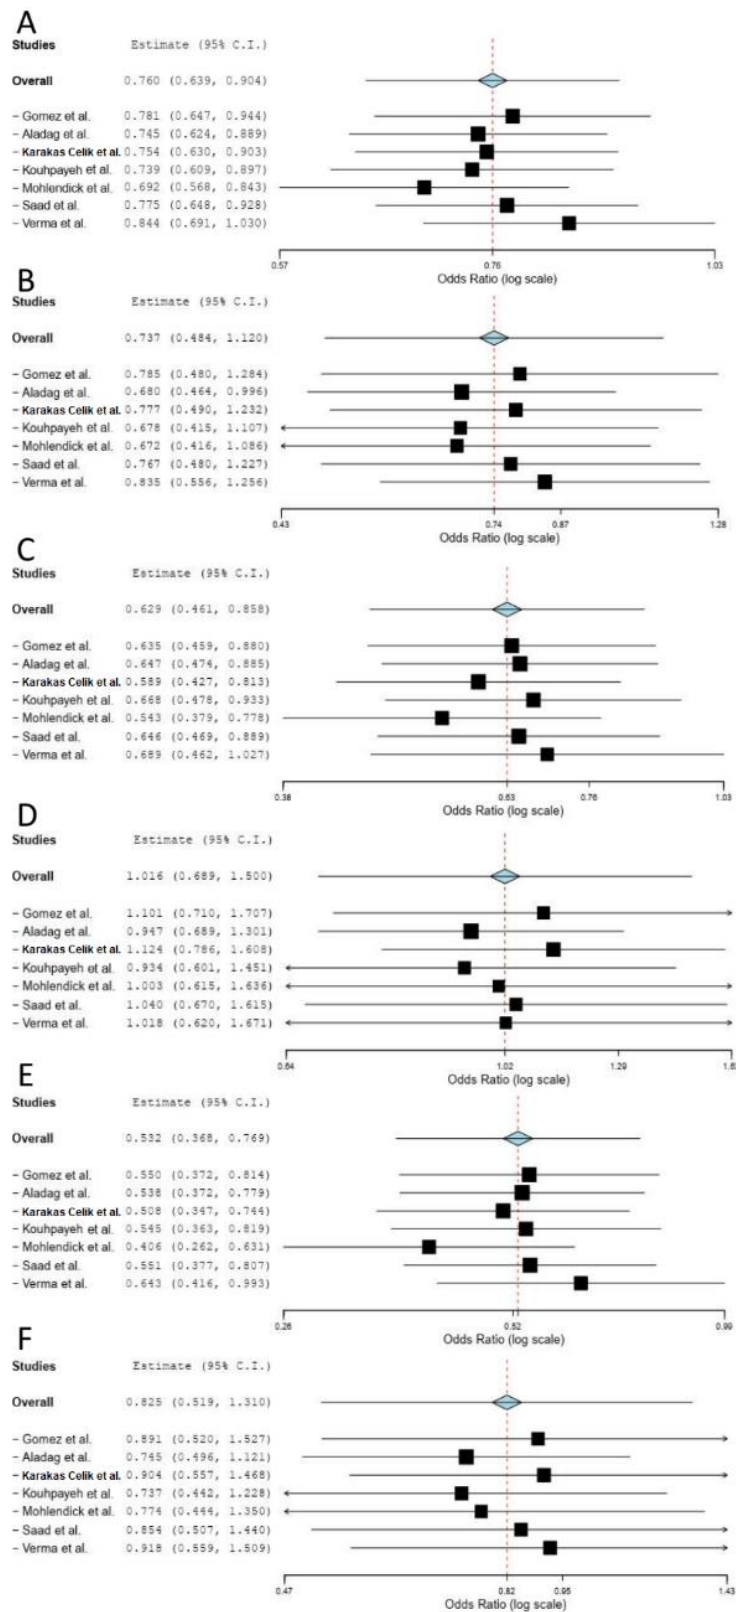

**Supplementary Figure 7:** Forest plots representing the results of sensitivity testing by leave-one-out meta-analysis of the association between rs1799752 in *ACE1* and COVID-19 severity: comparison severe vs. moderate. **A)** allelic model; **B)** dominant model; **C)** recessive model; **D)** overdominant model; **E)** II vs. DD; **F)** DI vs. DD. ORs with their 95 % CIs were used as risk estimates.



**Supplementary Table 1:** Newcastle-Ottawa scale quality assessment of the studies included in the qualitative synthesis

| Authors*              | Year  | Selection |        |        |        | Comparability |        | Outcome |        | Score |
|-----------------------|-------|-----------|--------|--------|--------|---------------|--------|---------|--------|-------|
|                       |       | Item 1    | Item 2 | Item 3 | Item 4 | Item 5        | Item 6 | Item 7  | Item 8 |       |
| Gómez et al.          | 2020  | *         | *      | *      | *      | *             | *      | *       | *      | 8     |
| Zhang et al.          | 2020  | *         | *      | *      | *      | *             | *      | *       | *      | 8     |
| Abdollahzadeh et al.  | 2021  | *         | *      | *      | *      |               | *      | *       | *      | 6     |
| Akin et al.           | 2022  | *         | *      | *      | *      | *             | *      | *       | *      | 8     |
| Aladag et al.         | 2021  | *         | *      | *      | *      | *             | *      | *       | *      | 8     |
| Al-Anouti et al.      | 2021  | *         | *      | *      | *      | **            | *      | *       | *      | 9     |
| Alghamdi et al.       | 2021  | *         | *      | *      | *      | **            | *      | *       | *      | 9     |
| Apaydin et al.        | 2021  | *         | *      | *      | *      | *             | *      | *       | *      | 8     |
| Cafiero et al.        | 2021  | *         | *      | *      | *      | *             | *      | *       | *      | 8     |
| Cuesta-Llavona et al. | 2021  | *         | *      | *      | *      |               | *      | *       | *      | 7     |
| Gómez et al.          | 2021  | *         | *      | *      | *      | **            | *      | *       | *      | 9     |
| Gunal et al.          | 2021  | *         | *      | *      | *      |               | *      | *       | *      | 7     |
| Hubacek et al.        | 2021  | *         | *      | *      | *      |               | *      | *       | *      | 7     |
| Íñiguez et al.        | 2021  | *         | *      | *      | *      | **            | *      | *       | *      | 9     |
| Karakaş Çelik et al.  | 2021  | *         | *      | *      | *      |               | *      | *       | *      | 7     |
| Kotur et al. (adults) | 2021  | *         | *      | *      | *      | **            | *      | *       | *      | 9     |
| Kouhpayeh et al.      | 2021  | *         | *      | *      | *      | **            | *      | *       | *      | 9     |
| Mir et al.            | 2021  | *         | *      | *      | *      |               | *      | *       | *      | 7     |
| Möhlendick et al.     | 2021  | *         | *      | *      | *      |               | *      | *       | *      | 7     |
| Monticelli et al.     | 2021  | *         | *      | *      | *      |               | *      | *       | *      | 6     |
| Peralta et al.        | 2021  | *         | *      | *      | *      |               | *      | *       | *      | 7     |
| Ravikanth et al.      | 2021  | *         | *      | *      | *      | **            | *      | *       | *      | 9     |
| Saad et al.           | 2021  | *         | *      | *      | *      | **            | *      | *       | *      | 9     |
| Schönfelder et al.    | 2021a | *         | *      | *      | *      |               | *      | *       | *      | 7     |
| Schönfelder et al.    | 2021b | *         | *      | *      | *      |               | *      | *       | *      | 7     |
| Verma et al.          | 2021  | *         | *      | *      | *      | **            | *      | *       | *      | 9     |
| Wulandari et al.      | 2021  | *         | *      | *      | *      |               | *      | *       | *      | 7     |
| Akbari et al.         | 2022  | *         | *      | *      | *      | **            | *      | *       | *      | 9     |
| Akin et al.           | 2022  | *         | *      | *      | *      | *             | *      | *       | *      | 8     |
| Wang et al.           | 2022  | *         | *      | *      | *      |               | *      | *       | *      | 7     |

\* References see main document
